# Supplementary material for: A New Method for the Assessment of the Oxidative Potential of Both Water-Soluble and Insoluble PM
Source: MDPI journal article supplement (doi:10.3390/atmos13020349), 2022-02-19
Supplement: s1 [file s1]

Supplementary Materials

# A New Method for the Assessment of the Oxidative Potential of Both Water-Soluble and Insoluble PM

Maria Agostina Frezzini, Gianluca Di Iulio, Caterina Tiraboschi, Silvia Canepari and Lorenzo Massimi \*

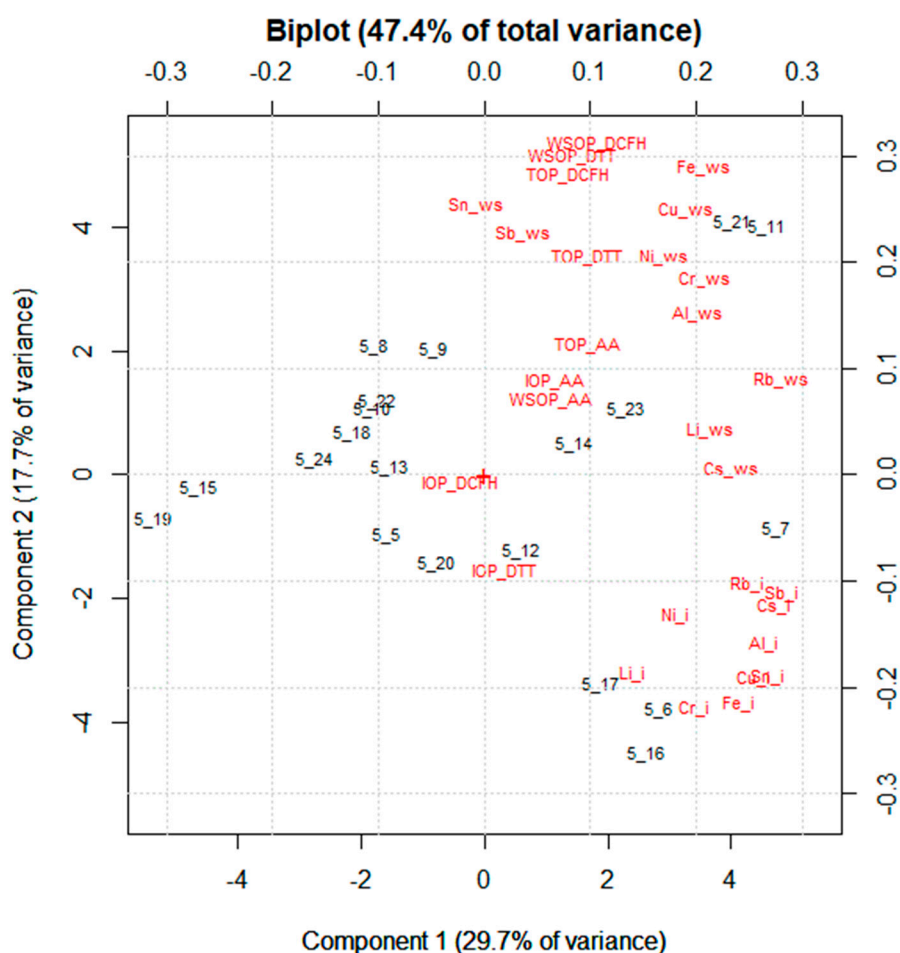

**Figure S1.** Biplot of PC1/PC2 from the PCA performed on the WSOP, TOP and IOP values for OP<sup>AA</sup>, OP<sup>DTT</sup> and OP<sup>DCFH</sup>, and element concentrations in the water-soluble (\_ws) and insoluble (\_i) fraction of the 20 PM<sub>10</sub> samples.

**Table S1.** Scores and loadings of the five significant components obtained by performing the PCA on the matrix of the data (580 data points) composed of 20 PM<sub>10</sub> samples and 29 variables.

| Sampling days | Scores   |          |          |          |          |
|---------------|----------|----------|----------|----------|----------|
|               | PC1      | PC2      | PC3      | PC4      | PC5      |
| 05/05/2021    | -1.58623 | -0.97751 | 0.366896 | -0.58442 | 0.525427 |
| 06/05/2021    | 2.825923 | -3.78792 | 3.093845 | 0.545744 | -0.39122 |
| 07/05/2021    | 4.723902 | -0.86232 | -1.14036 | -2.10932 | -1.13162 |
| 08/05/2021    | -1.8033  | 2.084004 | -1.30369 | 1.441808 | 1.868484 |
| 09/05/2021    | -0.83201 | 2.034397 | -1.10832 | -0.01011 | 0.298175 |
| 10/05/2021    | -1.80823 | 1.050559 | -0.8631  | 0.088544 | -1.31561 |
| 11/05/2021    | 4.579853 | 4.018884 | 2.279596 | 2.541445 | 0.896487 |
| 12/05/2021    | 0.582918 | -1.23078 | -0.27615 | -2.92858 | -0.90267 |
| 13/05/2021    | -1.53575 | 0.115022 | -0.13071 | -1.83719 | -0.55313 |
| 14/05/2021    | 1.459193 | 0.496354 | -3.52565 | -0.42523 | 2.837427 |
| 15/05/2021    | -4.62859 | -0.20388 | 0.716007 | -1.35113 | -0.341   |
| 16/05/2021    | 2.620193 | -4.48785 | -4.05242 | 1.277222 | 1.632599 |
| 17/05/2021    | 1.889916 | -3.38443 | 3.736475 | 0.667041 | 0.574365 |
| 18/05/2021    | -2.15952 | 0.67568  | 1.173823 | -1.38265 | 0.085947 |
| 19/05/2021    | -5.36124 | -0.71588 | 0.568159 | 1.140972 | 0.694384 |
| 20/05/2021    | -0.78153 | -1.41344 | 0.723884 | 1.187126 | 0.323789 |
| 21/05/2021    | 4.018949 | 4.075919 | 1.394198 | -2.57333 | 1.033031 |
| 22/05/2021    | -1.73454 | 1.199607 | 1.05762  | 2.003    | 0.199001 |
| 23/05/2021    | 2.296258 | 1.06587  | -2.21067 | 2.274585 | -4.77111 |
| 24/05/2021    | -2.76617 | 0.247707 | -0.49945 | 0.03448  | -1.56275 |

| Variables | Loadings |          |          |          |          |
|-----------|----------|----------|----------|----------|----------|
|           | PC1      | PC2      | PC3      | PC4      | PC5      |
| Al_ws     | 0.202118 | 0.152137 | 0.112682 | 0.119205 | 0.189423 |
| Cr_ws     | 0.209275 | 0.185106 | -0.09756 | 0.025169 | -0.26846 |
| Cs_ws     | 0.233754 | 0.005509 | 0.198207 | -0.25518 | 0.158213 |
| Cu_ws     | 0.191098 | 0.250126 | -0.15696 | -0.22041 | 0.000476 |
| Fe_ws     | 0.207767 | 0.289439 | -0.01825 | 0.151439 | -0.04107 |
| Li_ws     | 0.213234 | 0.043432 | 0.268443 | -0.16677 | 0.013301 |
| Ni_ws     | 0.170286 | 0.204958 | -0.23076 | -0.22054 | 0.124316 |
| Rb_ws     | 0.281455 | 0.09039  | 0.171594 | -0.02445 | 0.019824 |
| Sb_ws     | 0.037206 | 0.226891 | -0.03177 | 0.263081 | -0.11452 |
| Sn_ws     | -0.007   | 0.254486 | -0.13573 | 0.191646 | 0.278418 |
| Al_i      | 0.263753 | -0.15869 | 0.168546 | 0.152362 | -0.15281 |
| Cr_i      | 0.198209 | -0.21885 | -0.25667 | 0.080872 | 0.074766 |
| Cs_i      | 0.273661 | -0.12257 | 0.211103 | 0.03386  | -0.12215 |
| Cu_i      | 0.25519  | -0.19079 | -0.19718 | -0.09994 | 0.133902 |
| Fe_i      | 0.240169 | -0.21497 | -0.20856 | 0.043342 | 0.052501 |
| Li_i      | 0.13994  | -0.18706 | 0.30071  | 0.113352 | -0.05304 |
| Ni_i      | 0.180699 | -0.1324  | -0.28278 | -0.06543 | 0.272648 |
| Rb_i      | 0.248643 | -0.10284 | 0.15529  | 0.088082 | -0.21192 |
| Sb_i      | 0.281863 | -0.1117  | -0.10927 | 0.076375 | -0.05547 |
| Sn_i      | 0.268744 | -0.18949 | -0.11911 | 5.76E-05 | 0.156959 |
| WSOP_DCFH | 0.106592 | 0.31247  | 0.003721 | 0.282605 | 0.122929 |
| WSOP_AA   | 0.080588 | 0.282404 | 0.244534 | -0.01092 | 0.080655 |
| WSOP_DTT  | -0.02158 | -0.00766 | 0.29737  | -0.332   | -0.04064 |

|                 |          |          |          |          |          |
|-----------------|----------|----------|----------|----------|----------|
| <b>TOP_DCFH</b> | 0.064564 | 0.070874 | -0.00942 | -0.47377 | -0.23155 |
| <b>TOP_AA</b>   | 0.098635 | 0.122204 | -0.15466 | -0.02628 | -0.48675 |
| <b>TOP_DTT</b>  | 0.066954 | 0.088444 | -0.16027 | 0.25711  | -0.38284 |
| <b>IOP_DCFH</b> | 0.083487 | 0.300087 | -0.07867 | -0.19464 | 0.064812 |
| <b>IOP_AA</b>   | 0.09791  | 0.205504 | 0.161367 | 0.05422  | 0.221876 |
| <b>IOP_DTT</b>  | 0.019403 | -0.0906  | 0.259459 | 0.264108 | 0.174796 |

**Table S2.** Results of this study compared with other findings available in the literature.

| References                 | Performed OP assays                                         | PM aerodynamic diameter                  | Main findings                                                                                                                                                        |
|----------------------------|-------------------------------------------------------------|------------------------------------------|----------------------------------------------------------------------------------------------------------------------------------------------------------------------|
| This study                 | OP <sup>DCFH</sup><br>OP <sup>AA</sup><br>OP <sup>DTT</sup> | PM <sub>10</sub>                         | Water-soluble PM is mainly responsible for the generation of the TOP.<br>Insoluble PM from mineral dust contribute to the IOP <sup>DCFH</sup> and IOP <sup>DTT</sup> |
| Frezzini et al., 2022 [42] | OP <sup>DCFH</sup><br>OP <sup>AA</sup><br>OP <sup>DTT</sup> | PM <sub>10</sub>                         | The redox activity of the insoluble fraction of PM provided a significant contribution to the OP <sup>AA</sup>                                                       |
| Gao et al., 2020 [15]      | OP <sup>DTT</sup>                                           | PM <sub>2.5</sub>                        | Water-insoluble PM contributed $\approx 20\%$ to the OP of particles                                                                                                 |
| Wang et al., 2013 [43]     | Macrophage ROS assay (DCFH)                                 | Coarse<br>PM <sub>2.5</sub><br>Ultrafine | Insoluble fraction played a key role in potential toxicity of PM                                                                                                     |
| Verma et al., 2012 [45]    | OP <sup>DTT</sup>                                           | PM <sub>2.5</sub>                        | Hydrophobic fraction of insoluble organic aerosols contributed to the oxidative properties of ambient PM                                                             |
| Daher et al., 2011 [40]    | OP <sup>DTT</sup><br>Dihydroxybenzoate (DHBA)               | PM <sub>2.5</sub>                        | Insoluble PM species emerged as potentially redox active                                                                                                             |
